# Supplementary material for: Hypertension and Related Comorbidities as Potential Risk Factors for COVID-19 Hospitalization and Severity: A Prospective Population-Based Cohort Study
Source: PubMed Central journal article supplement (PMC8000595; doi:10.3390/jcm10061194), 2021-03-12
Supplement: jcm-10-01194-s001.pdf [file jcm-10-01194-s001.pdf]

## Supplementary Material

**Supplementary Table S1.** Codes of the International Classification of Primary Care version 2 [1] considered in the current study.

| <b>Condition</b>        | <b>Code</b>                  | <b>Description</b>                            |
|-------------------------|------------------------------|-----------------------------------------------|
| Hypertension            | K86                          | Hypertension uncomplicated                    |
|                         | K87                          | Hypertension complicated                      |
| Cardiovascular disease  | K71                          | Rheumatic fever/heart disease                 |
|                         | K74                          | Ischaemic heart disease with angina           |
|                         | K75                          | Acute myocardial infarction                   |
|                         | K76                          | Ischaemic heart disease without angina        |
|                         | K77                          | Heart failure                                 |
|                         | K81                          | Heart/arterial murmur not otherwise specified |
|                         | K82                          | Pulmonary heart disease                       |
|                         | K83                          | Heart valve disease not otherwise specified   |
|                         | K84                          | Heart disease other                           |
| K99                     | Cardiovascular disease other |                                               |
| Cerebrovascular disease | K90                          | Stroke/cerebrovascular accident               |
|                         | K91                          | Cerebrovascular disease                       |
| Chronic kidney disease  | U99                          | Urinary disease, other                        |

**Supplementary Table S2.** Characteristics of the study population, and patients with the assessed COVID-19 outcomes (hospitalization, severe case, intensive care unit admission and death).

| <b>Characteristics</b>                              | <b>Population</b><br>n = 424,784<br>% | <b>Hospitalized</b><br>patients<br>n =1,106<br>% | <b>Severe</b><br>cases<br>n = 176<br>% | <b>Intensive care</b><br>unit admitted<br>n = 117<br>% | <b>Deaths</b><br>n = 97<br>% |
|-----------------------------------------------------|---------------------------------------|--------------------------------------------------|----------------------------------------|--------------------------------------------------------|------------------------------|
| <b>Sex</b>                                          |                                       |                                                  |                                        |                                                        |                              |
| Female                                              | 49.4                                  | 43.1                                             | 29.5                                   | 29.9                                                   | 28.9                         |
| Male                                                | 50.6                                  | 56.9                                             | 70.5                                   | 70.1                                                   | 71.1                         |
| <b>Age, years</b>                                   |                                       |                                                  |                                        |                                                        |                              |
| 25-49                                               | 49.6                                  | 23.6                                             | 6.3                                    | 9.4                                                    | 1.0                          |
| 50-64                                               | 30.3                                  | 32.7                                             | 28.4                                   | 38.5                                                   | 15.5                         |
| 65-79                                               | 20.2                                  | 43.7                                             | 65.3                                   | 52.1                                                   | 83.5                         |
| <b>Country of origin</b>                            |                                       |                                                  |                                        |                                                        |                              |
| Spain                                               | 81.5                                  | 79.7                                             | 90.3                                   | 86.3                                                   | 93.8                         |
| Other                                               | 18.6                                  | 20.3                                             | 9.7                                    | 13.7                                                   | 6.2                          |
| <b>Municipality population</b>                      |                                       |                                                  |                                        |                                                        |                              |
| >100,000                                            | 31.9                                  | 38.4                                             | 33.5                                   | 34.2                                                   | 32.0                         |
| 5000-100,000                                        | 34.4                                  | 34.7                                             | 37.5                                   | 39.3                                                   | 33.0                         |
| <5000                                               | 33.7                                  | 26.9                                             | 29.0                                   | 26.5                                                   | 35.1                         |
| <b>Annual taxable income level (€)</b>              |                                       |                                                  |                                        |                                                        |                              |
| None/dependent                                      | 5.9                                   | 6.5                                              | 7.4                                    | 10.3                                                   | 6.2                          |
| <18,000                                             | 53.0                                  | 48.7                                             | 46.6                                   | 36.8                                                   | 59.8                         |
| 18,000-100,000                                      | 40.5                                  | 42.9                                             | 43.2                                   | 49.6                                                   | 33.0                         |
| >100,000                                            | 0.7                                   | 1.9                                              | 2.8                                    | 3.4                                                    | 1.0                          |
| <b>Primary healthcare visits in prior 12 months</b> |                                       |                                                  |                                        |                                                        |                              |
| 0                                                   | 20.0                                  | 9.8                                              | 9.1                                    | 9.4                                                    | 7.2                          |
| 1-4                                                 | 41.7                                  | 32.9                                             | 27.8                                   | 34.2                                                   | 23.7                         |
| 5-9                                                 | 21.1                                  | 26.9                                             | 27.3                                   | 27.4                                                   | 26.8                         |
| >9                                                  | 17.3                                  | 30.4                                             | 35.8                                   | 29.1                                                   | 42.3                         |
| <b>Hospitalization in prior 12 months</b>           | 5.5                                   | 9.6                                              | 15.3                                   | 10.3                                                   | 22.7                         |
| <b>Smoking status</b>                               |                                       |                                                  |                                        |                                                        |                              |
| Current smoker                                      | 14.6                                  | 24.5                                             | 22.7                                   | 22.2                                                   | 26.8                         |
| Former smoker                                       | 5.0                                   | 9.5                                              | 12.5                                   | 8.5                                                    | 15.5                         |
| Never smoker                                        | 18.1                                  | 10.5                                             | 19.3                                   | 18.8                                                   | 19.6                         |
| Unknown                                             | 62.4                                  | 55.5                                             | 45.5                                   | 50.4                                                   | 38.1                         |
| <b>Hypertension</b>                                 | 16.8                                  | 32.0                                             | 48.3                                   | 44.4                                                   | 56.7                         |
| <b>Hypertension-related conditions</b>              |                                       |                                                  |                                        |                                                        |                              |
| Cardiovascular disease                              | 7.3                                   | 17.0                                             | 29.0                                   | 21.4                                                   | 42.3                         |
| Cerebrovascular disease                             | 1.3                                   | 4.2                                              | 9.1                                    | 4.3                                                    | 16.5                         |
| Chronic kidney disease                              | 2.3                                   | 8.0                                              | 15.3                                   | 8.5                                                    | 21.6                         |
| <b>Any other major chronic condition</b>            | 19.9                                  | 36.3                                             | 54.0                                   | 49.6                                                   | 62.9                         |

Reference

1. International Classification Committee of WONCA. International Classification of Primary Care – Revised 2nd Edition. Oxford University Press: Oxford, 2005.
